# Supplementary material for: Rheumatoid arthritis reprograms circadian output pathways
Source: Springer Nature journal article supplement (doi:10.1186/s13075-019-1825-y), 2019-02-06
Supplement: MOESM1 [file 16446800]

# Supplementary S1

| RA001        | RA002* | RA003          | RA004         | RA005*    | RA006        | RA007        | RA008              | RA009        | RA011           |
|--------------|--------|----------------|---------------|-----------|--------------|--------------|--------------------|--------------|-----------------|
| methotrexate | none   | viscotears     | methotrexate  | ibuprofen | methotrexate | methotrexate | hydroxychloroquine | methotrexate | methotrexate    |
| folic acid   |        | tears natural  | naproxen      |           |              | folic acid   | naproxen           | rabeprazole  | abatacept       |
| tramadol     |        | seretide spray | losartan      |           |              |              |                    | aspirin      | sulfasalazine   |
| paracetamol  |        |                | atorvastatin  |           |              |              |                    | diltiazem    | pregabalin      |
| ibuprofen    |        |                | gliclazide    |           |              |              |                    | folic acid   | ibuprofen       |
|              |        |                | sulfasalazine |           |              |              |                    | perindopril  | calcium & vit D |
|              |        |                | metformin     |           |              |              |                    | atorvastatin | folic acid      |
|              |        |                | cod liver oil |           |              |              |                    |              | omeprazole      |
|              |        |                | ventolin      |           |              |              |                    |              |                 |

| H001 | H002 | H003 | H004 | H005 | H006 | H007 | H008 | H009 | H010 |
|------|------|------|------|------|------|------|------|------|------|
| Nil  | Nil  | Nil  | Nil  | Nil  | Nil  | Nil  | Nil  | Nil  | Nil  |

Comments

RA002\*New patient studied pre-treatment initiation

RA005\*recently stopped MTX and hydroxychloroquine
