# Supplementary material for: Rheumatoid arthritis reprograms circadian output pathways
Source: Springer Nature journal article supplement (doi:10.1186/s13075-019-1825-y), 2019-02-06

**Fig. S2**

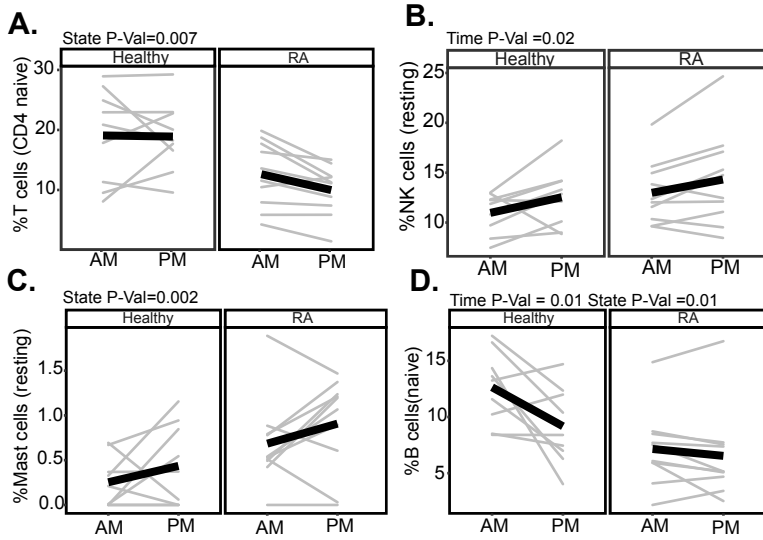

**E.**

**AM RA vs Healthy      PM RA vs Healthy**

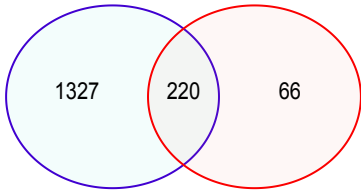

**L. RA AM vs Healthy AM gene Reactome pathway TLR4 cascade**

| SYMBOL  | logFC  | logCPM | LR      | PValue | FDR    |
|---------|--------|--------|---------|--------|--------|
| BIRC2   | 0.3258 | 6.4298 | 18.4610 | 0.0000 | 0.0023 |
| IRAK4   | 0.2506 | 6.8487 | 13.7338 | 0.0002 | 0.0100 |
| NOD2    | 0.7029 | 6.0349 | 13.6324 | 0.0002 | 0.0103 |
| CD36    | 0.7708 | 8.5454 | 13.5198 | 0.0002 | 0.0105 |
| PELI2   | 0.4303 | 5.3707 | 12.3410 | 0.0004 | 0.0145 |
| ITGAM   | 0.5081 | 8.4576 | 11.6779 | 0.0006 | 0.0177 |
| DUSP3   | 0.5481 | 5.9640 | 11.6088 | 0.0007 | 0.0180 |
| S100A12 | 1.0028 | 6.2138 | 11.2498 | 0.0008 | 0.0201 |
| IRAK3   | 0.6671 | 7.5830 | 10.8884 | 0.0010 | 0.0226 |
| MAPK14  | 0.3921 | 7.0707 | 10.4565 | 0.0012 | 0.0256 |
| LY96    | 0.7079 | 3.1553 | 9.2217  | 0.0024 | 0.0371 |
| MAP3K7  | 0.1548 | 6.1184 | 8.8874  | 0.0029 | 0.0409 |
| TLR2    | 0.6471 | 7.7056 | 8.7530  | 0.0031 | 0.0427 |
| TBK1    | 0.3521 | 5.5614 | 8.7177  | 0.0032 | 0.0430 |
| CHUK    | 0.2523 | 5.3874 | 8.7167  | 0.0032 | 0.0430 |

**F.**

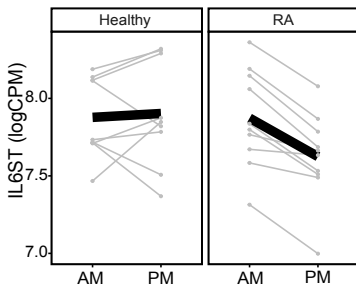

**G.**

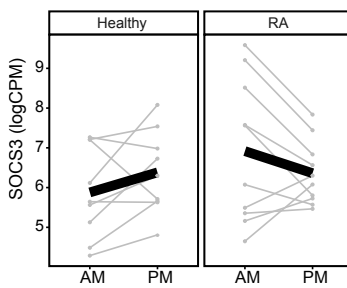

**H.**

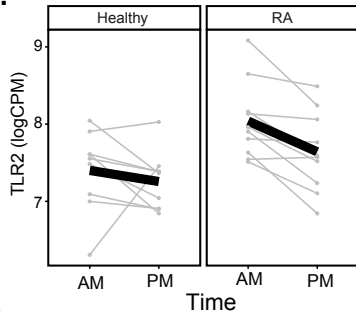

**I.**

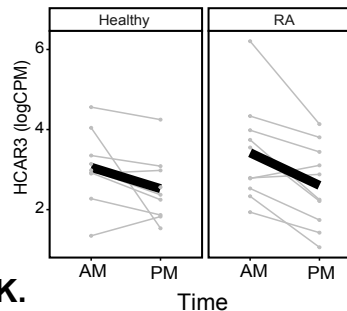

**J.**

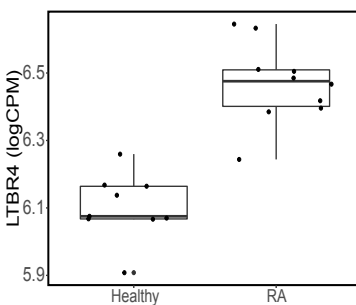

**K.**

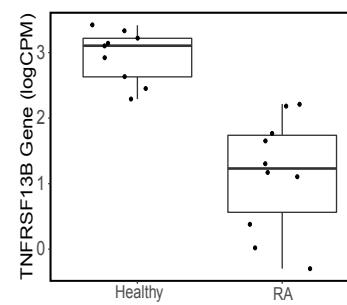

**M.**

Expression level (Z score)

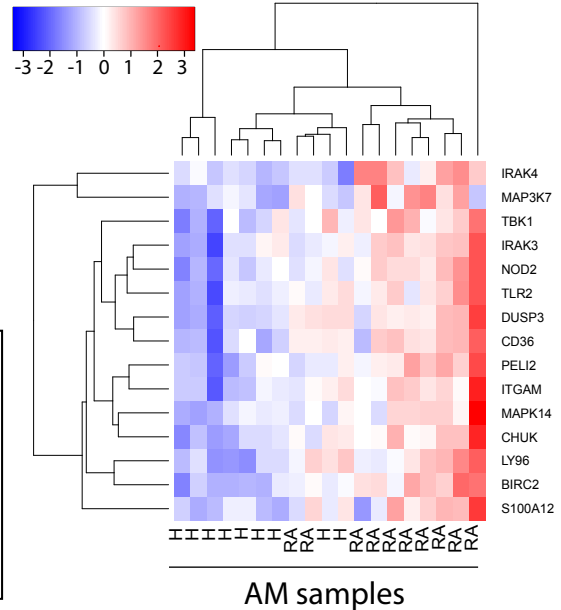

Supplement: MOESM4 [file 16446800]
