# Supplementary material for: Rheumatoid arthritis reprograms circadian output pathways
Source: Springer Nature journal article supplement (doi:10.1186/s13075-019-1825-y), 2019-02-06

FigS4

A.

RA LPS AM DN-regulated

| TF     | NES | Targets | Motifs |
|--------|-----|---------|--------|
| RHOXF1 | 4.1 | 155     | 3      |
| HMGB4  | 3.8 | 83      | 4      |
| NFYB   | 3.8 | 39      | 1      |

RA LPS AM UP-regulated

| TF    | NES | Targets | Motifs |
|-------|-----|---------|--------|
| RXRA  | 4.6 | 44      | 2      |
| SRF   | 4.2 | 121     | 7      |
| DMRT2 | 3.8 | 68      | 3      |

B.

RA LPS PM DN-regulated

| TF     | NES | Targets | Motifs |
|--------|-----|---------|--------|
| YY1    | 4.1 | 267     | 3      |
| GABPA  | 3.8 | 262     | 9      |
| POLR3A | 3.8 | 267     | 3      |

RA LPS PM UP-regulated

| TF    | NES | Targets | Motifs |
|-------|-----|---------|--------|
| CREB1 | 5.9 | 241     | 16     |
| YY1   | 3.6 | 36      | 1      |
| PPARG | 3.6 | 115     | 4      |

C.

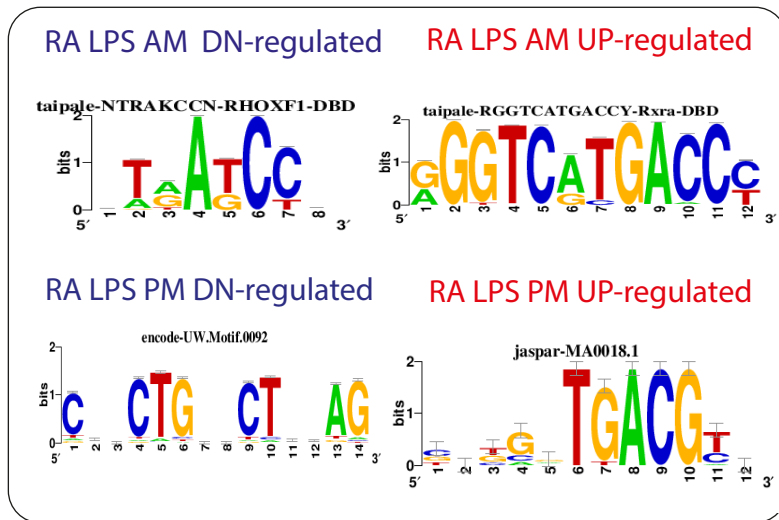

Supplement: MOESM7 [file 16446800]
