# Supplementary material for: Rheumatoid arthritis reprograms circadian output pathways
Source: Springer Nature journal article supplement (doi:10.1186/s13075-019-1825-y), 2019-02-06

# Fig.S6

## A.

### Average arthritis score

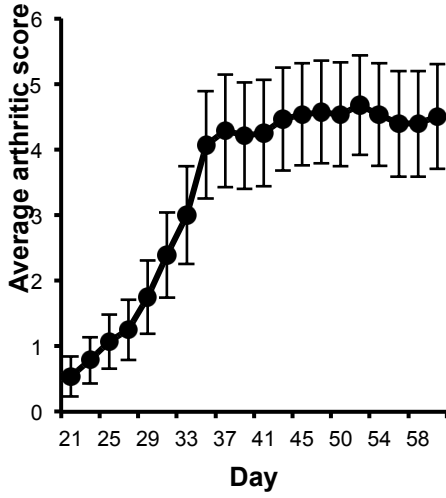

## B.

### Incidence

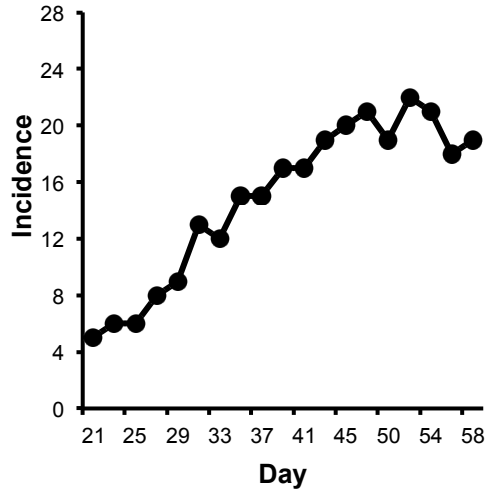

## C.

### Average hind paw thickness

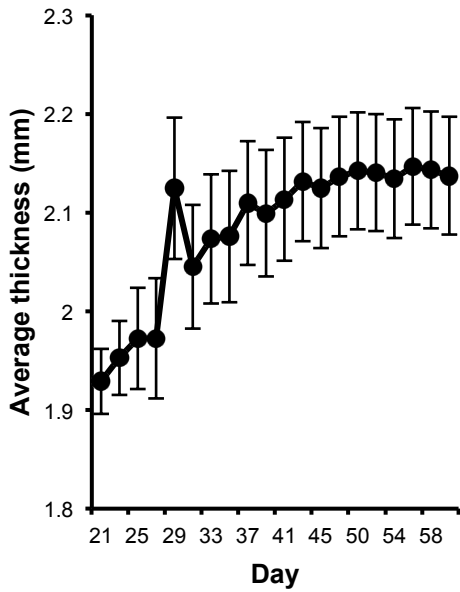

Supplement: MOESM9 [file 16446800]
