# Supplementary material for: Rheumatoid arthritis reprograms circadian output pathways
Source: Springer Nature journal article supplement (doi:10.1186/s13075-019-1825-y), 2019-02-06

# Fig.S7

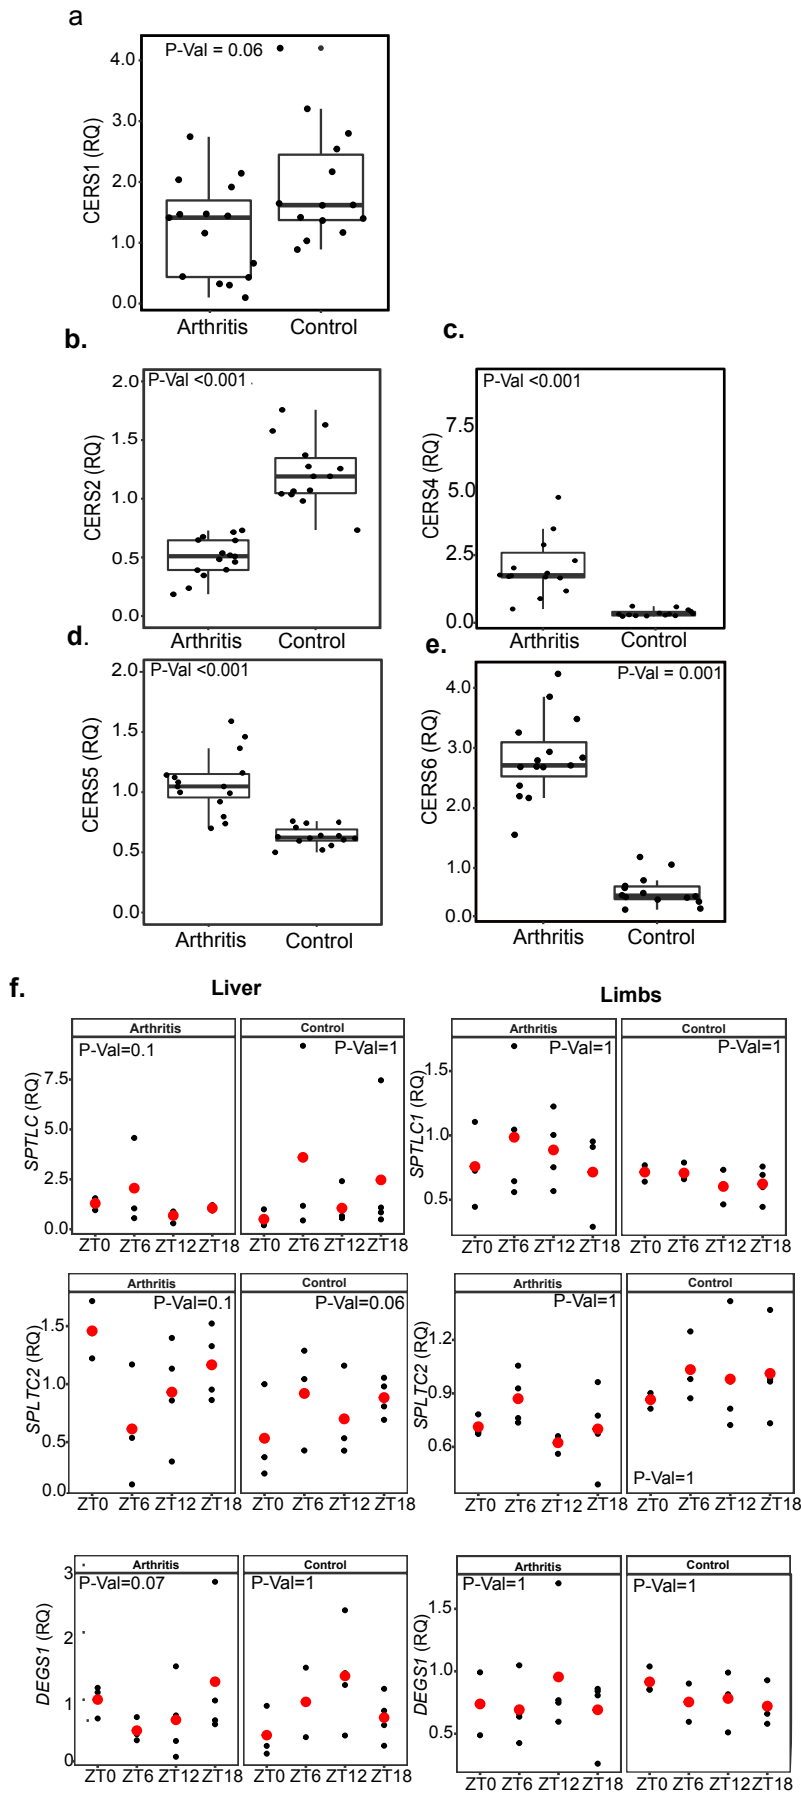

Supplement: MOESM10 [file 16446800]
